# Supplementary material for: Genetic and Lineage Classification of Glioma-Initiating Cells Identifies a Clinically Relevant Glioblastoma Model
Source: PubMed Central journal article supplement (PMC6826962; doi:10.3390/cancers11101564), 2019-10-15
Supplement: cancers-11-01564-s001.pdf [file cancers-11-01564-s001.pdf]

# Supplementary Materials: Genetic and Lineage Classification of Glioma-Initiating Cells Identifies a Clinically Relevant Glioblastoma Model

Norihiko Saito, Nozomi Hirai, Kazuya Aoki, Sho Sato, Ryo Suzuki, Yu Hiramoto, Satoshi Fujita, Haruo Nakayama, Morito Hayashi, Takatoshi Sakurai and Satoshi Iwabuchi

**Table S1.** Background information on GICs.

| Cell line name | Age | Gender | Pathology | Subtype of original tumor | Subtype of GICs |
|----------------|-----|--------|-----------|---------------------------|-----------------|
| GICT14         | 62  | F      | GBM       | Neural                    | Neural          |
| GICT12         | 48  | F      | GBM       | Neural                    | Neural          |
| GICT46         | 75  | M      | GBM       | Neural                    | Neural          |
| GICT20         | 55  | F      | GBM       | Neural                    | Neural          |
| GICT24         | 58  | M      | GBM       | Neural                    | Neural          |
| GICT35         | 56  | M      | GBM       | Neural                    | Neural          |
| GICT11         | 51  | F      | GBM       | Proneural                 | Proneural       |
| GICT22         | 71  | M      | GBM       | Proneural                 | Proneural       |
| GICT14         | 42  | M      | GBM       | Proneural                 | Proneural       |
| GICT25         | 63  | F      | GBM       | Proneural                 | Proneural       |
| GICT18         | 59  | F      | GBM       | Proneural                 | Proneural       |
| GICT28         | 73  | F      | GBM       | Proneural                 | Proneural       |
| GICT15         | 64  | M      | GBM       | Classical                 | Classical       |
| GICT12         | 38  | M      | GBM       | Classical                 | Classical       |
| GICT32         | 66  | M      | GBM       | Classical                 | Classical       |
| GICT23         | 52  | F      | GBM       | Classical                 | Classical       |
| GICT40         | 69  | F      | GBM       | Classical                 | Classical       |
| GICT19         | 47  | M      | GBM       | Classical                 | Classical       |
| GICT17         | 68  | M      | GBM       | Mesenchymal               | Mesenchymal     |
| GICT38         | 57  | M      | GBM       | Mesenchymal               | Mesenchymal     |
| GICT29         | 42  | F      | GBM       | Mesenchymal               | Mesenchymal     |
| GICT44         | 65  | F      | GBM       | Mesenchymal               | Mesenchymal     |
| GICT22         | 58  | M      | GBM       | Mesenchymal               | Mesenchymal     |
| GICT16         | 67  | M      | GBM       | Mesenchymal               | Mesenchymal     |
| GICT21         | 55  | F      | GBM       | Mesenchymal               | Mesenchymal     |

**Table S2.** Summary of GIC subtypes differentiation potential in vitro. GIC subtypes cultured under differentiation condition (1% FBS + 1 uM RA) exhibited differential potential of differentiation into neural lineage.

|                | Lineage markers                  | Neural<br>(n = 6) | Proneural<br>(n = 6) | Classical<br>(n = 6) | Mesenchymal<br>(n = 7) |
|----------------|----------------------------------|-------------------|----------------------|----------------------|------------------------|
| Neural Lineage | Astrocytic<br>(GFAP, S100β)      | 5/6               | 6/6                  | 6/6                  | 2/7                    |
|                | Neuronal (Tuj1)                  | 6/6               | 6/6                  | 5/6                  | 0/7                    |
|                | Oligodendrocytic<br>(CNPase, O4) | 1/6               | 6/6                  | 4/6                  | 0/7                    |

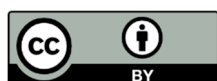

© 2019 by the authors. Licensee MDPI, Basel, Switzerland. This article is an open access article distributed under the terms and conditions of the Creative Commons Attribution (CC BY) license (<http://creativecommons.org/licenses/by/4.0/>).
